# Supplementary material
Source: PubMed Central journal article supplement (PMC3985750)
Supplement: bi401449z_si_001.pdf [file bi401449z_si_001.pdf]

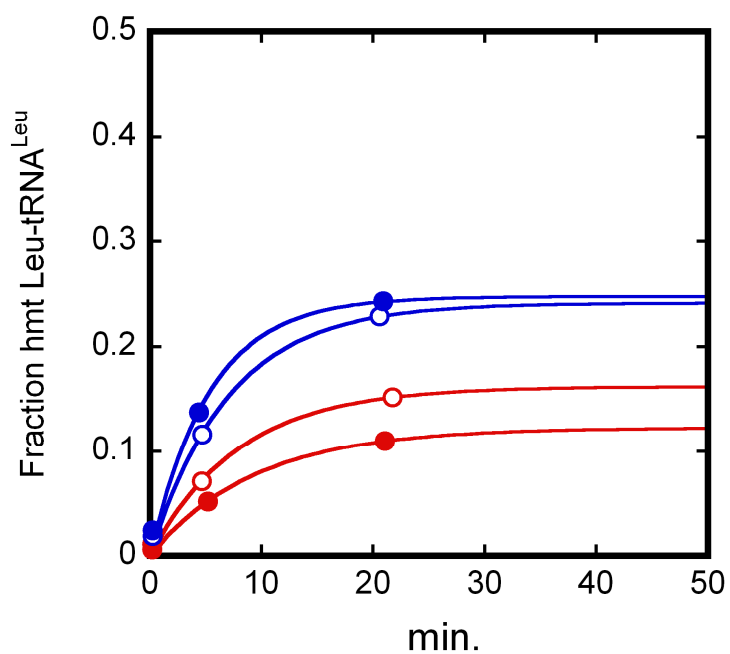

Figure S1. Magnesium acetate gives higher plateau charging values for hmt tRNA<sup>Leu</sup><sub>UAA</sub> transcript compared to magnesium chloride. Reactions were performed at 1  $\mu$ M LARS-2 in the presence of either magnesium chloride (red symbols and traces) (or) magnesium acetate (blue symbols and traces) at 37°C at concentrations of either 20 mM Mg<sup>2+</sup> (open symbols) or 55 mM Mg<sup>2+</sup> (closed symbols).

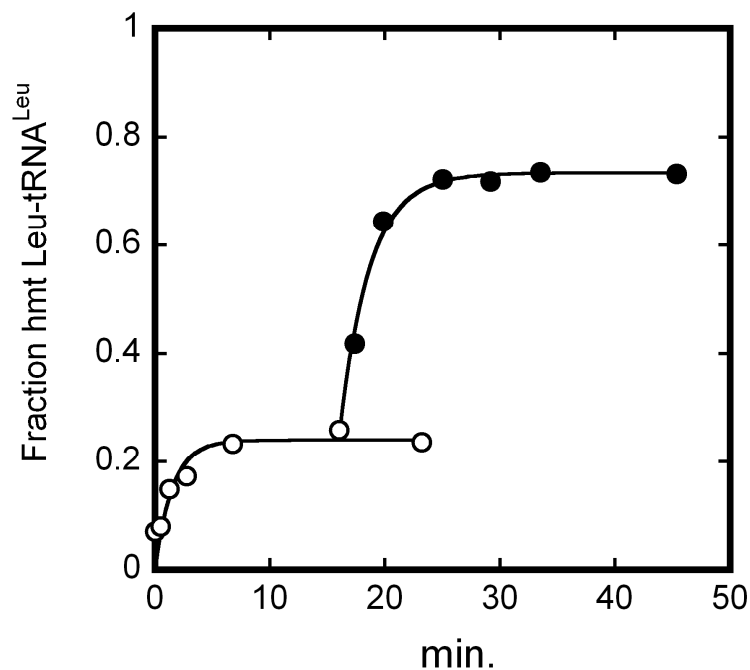

**Figure S2.** Aminoacylation plateau value is low at higher temperature ( $>37^{\circ}\text{C}$ ) for hmt tRNA<sup>Leu</sup> because of structural instability and not because of RNA being damaged at these temperatures. Leucylation of hmt tRNA<sup>Leu</sup><sub>UAA</sub> was performed at  $45^{\circ}\text{C}$  and at 20 mM  $\text{Mg}(\text{oAc})_2$ , which resulted in a low plateau value for aminoacylation (0.25) (Open symbols and trace). A large aliquot was transferred to  $21^{\circ}\text{C}$  and aminoacylation monitored at  $21^{\circ}\text{C}$  (solid symbols and trace). Because the only difference that resulted in higher plateau value was a transfer to a lower temperature, we conclude that the tRNA was not damaged at  $45^{\circ}\text{C}$  but secondary and/or tertiary structure was severely perturbed at  $45^{\circ}\text{C}$  compared to  $21^{\circ}\text{C}$ .

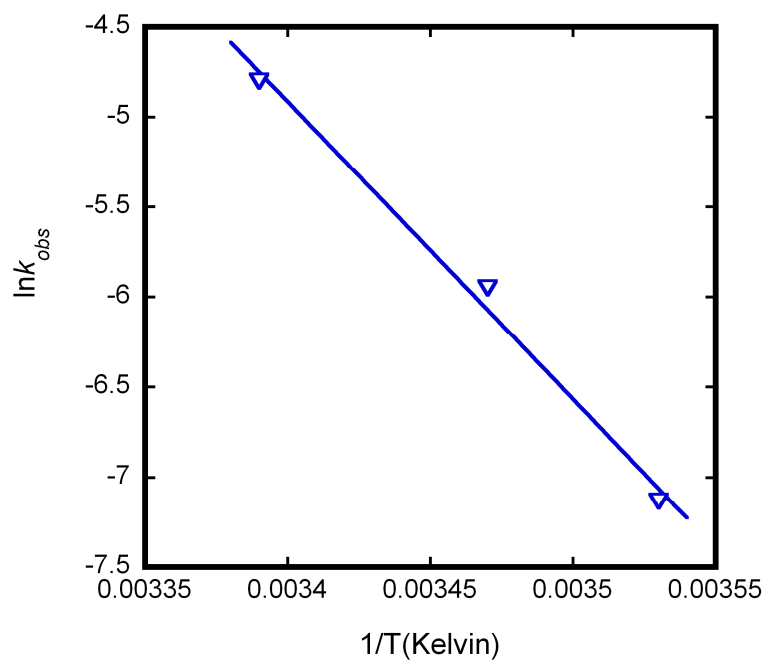

Figure S3. Log-linear plot of the rate constant against  $1/T$  (Kelvin) for folding of the hmt tRNA<sup>Leu</sup><sub>UAA</sub> transcript (see Figure 4). The slope is equal to  $-E_a/R$ , where  $E_a$  is the activation energy and  $R$  is the gas constant ( $8.314 \text{ J mol}^{-1} \text{ K}^{-1}$ ). The fit gives  $E_a$  of  $13.7 \times 10^4 \text{ J mol}^{-1}$  ( $32.8 \text{ kcal mol}^{-1}$ ).

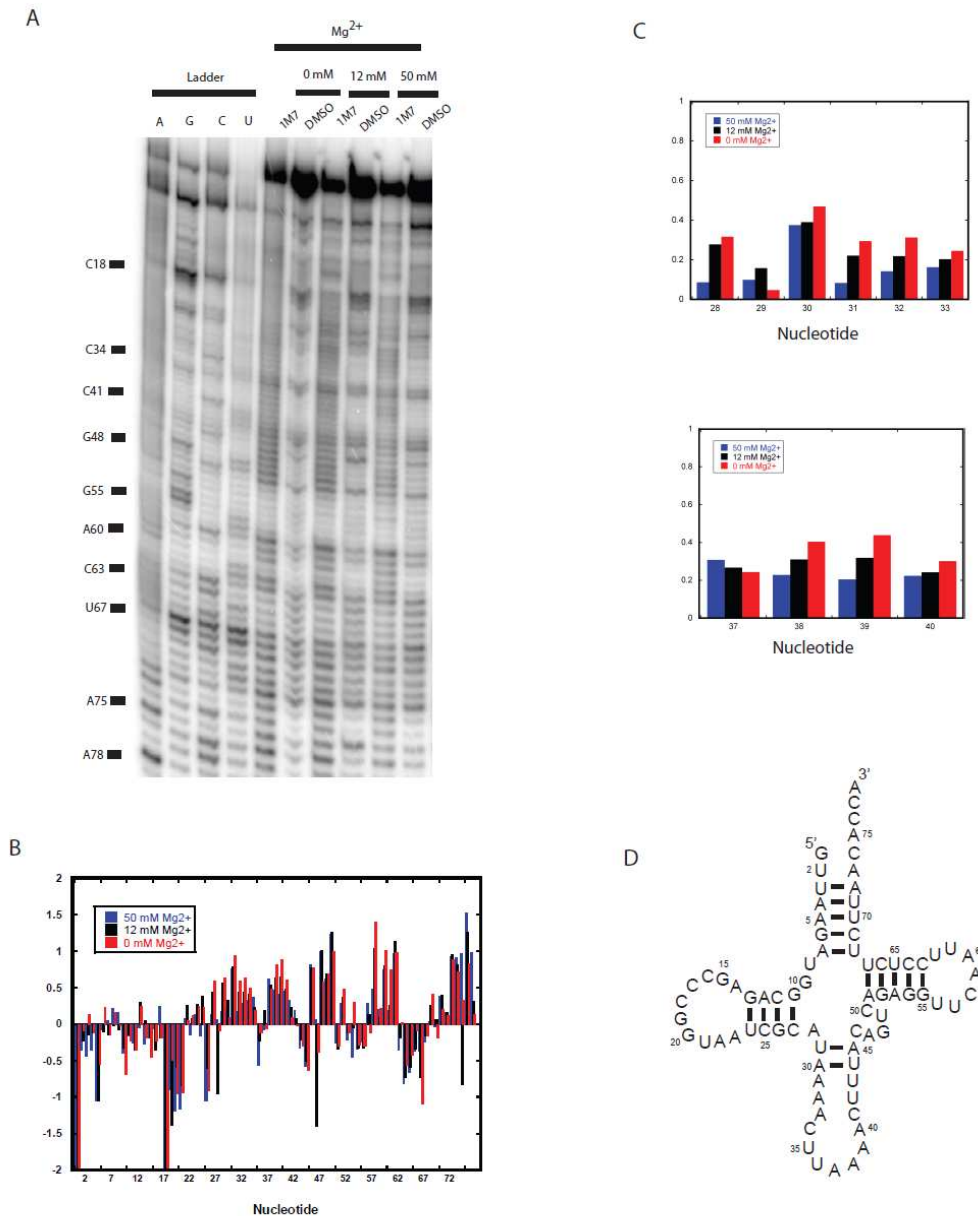

**Figure S4.** 1M7 SHAPE analysis at different Mg<sup>2+</sup> concentrations. (A) SHAPE footprinting gel showing DMSO and 1M7 intensities at 0, 12 and 50 mM MgCl<sub>2</sub>. (B) Absolute SHAPE reactivities at 0, 12 and 50 mM MgCl<sub>2</sub>. (C) Absolute SHAPE reactivities of a subset of nucleotides at 0, 12 and 50 mM MgCl<sub>2</sub>. Nucleotides 28, 31, 32, 33, 38, 39 and 40 show clear protections at increasing MgCl<sub>2</sub> up to 50 mM.



Figure S5. Predicted optimal (upper left) and sub-optimal secondary structures of hmt tRNA<sup>Leu</sup><sub>UAA</sub> transcript tRNA. Structures were predicted using minimal energy criteria using MC-fold.

## Bos taurus

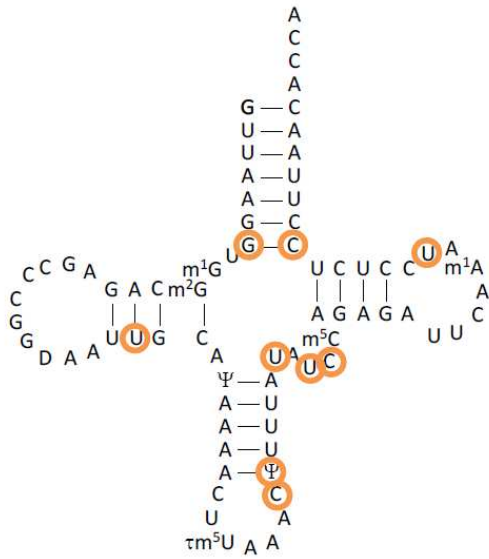

## Homo sapiens

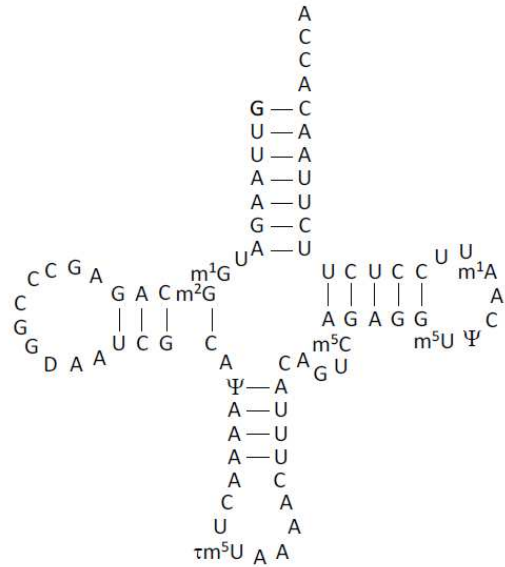

○ Differences in sequence from Homo sapiens

**Figure S6.** Predicted native secondary structures (based on comparative sequence analysis) of human and bovine transcript tRNA<sup>Leu</sup><sub>UAA</sub>. Differences in primary sequence are circled in the *Bos taurus* tRNA.
